# Supplementary material for: Focused crawling strategies based on ontologies and simulated annealing methods for rainstorm disaster domain knowledge
Source: Springer Nature journal article supplement (doi:10.1631/fitee.2100360), 2022-08-01
Supplement: 11714_2022_1841_MOESM1_ESM.pdf [file 11714_2022_1841_MOESM1_ESM.pdf]

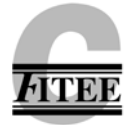

## Supplementary materials for

Jingfa LIU, Fan LI, Ruoyao DING, Zi'ang LIU, 2022. Focused crawling strategies based on ontologies and simulated annealing methods for rainstorm disaster domain knowledge. *Front Inform Technol Electron Eng*, 23(8):1189-1204. <https://doi.org/10.1631/FITEE.2100360>

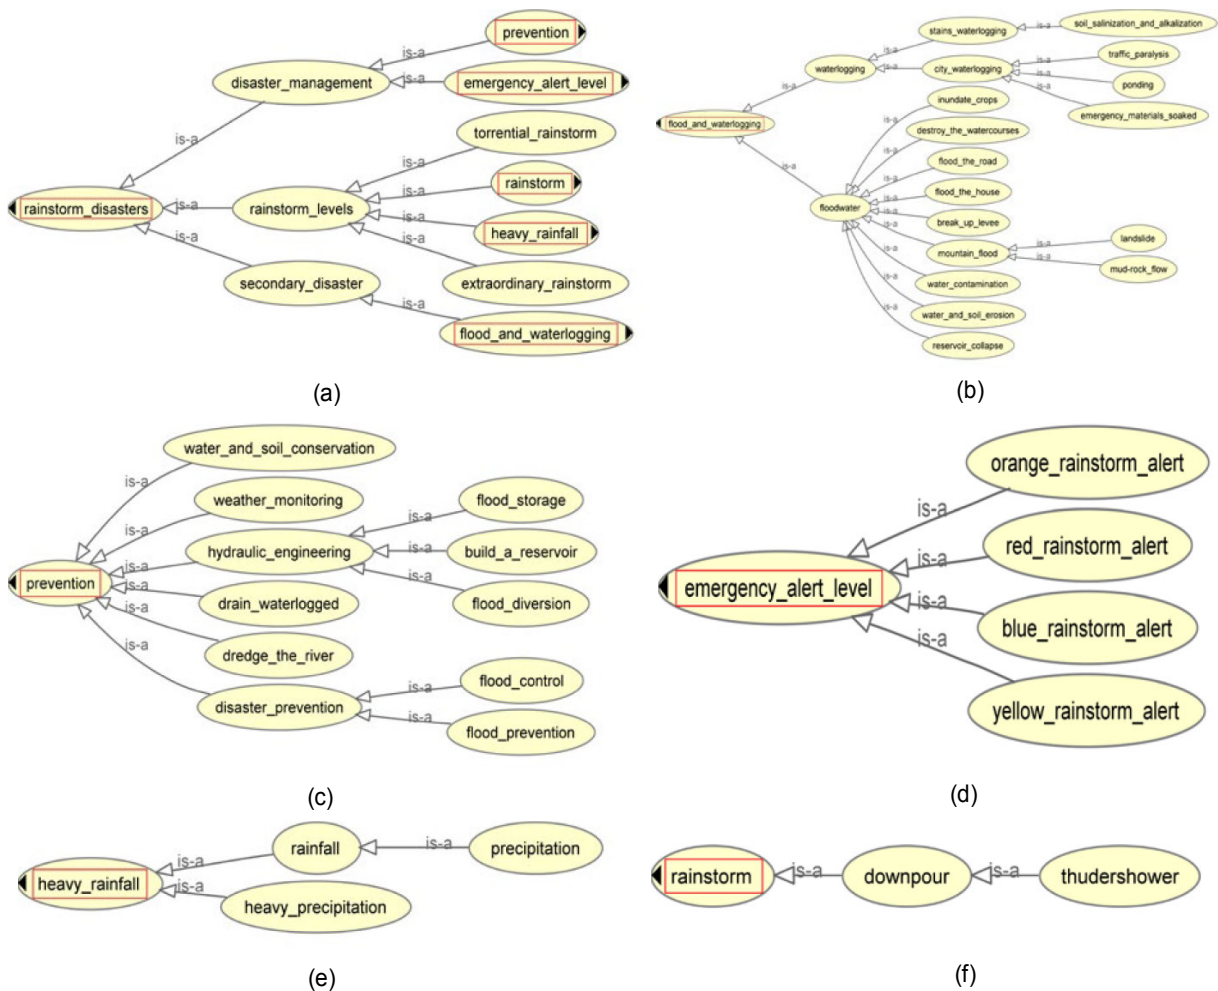

Fig. S1 A global ontology structure about the topic of rainstorm disaster: (a) main part of the rainstorm disaster ontology; (b) flood and waterlogging part of the rainstorm disaster ontology; (c) prevention part of the rainstorm disaster ontology; (d) emergency alert level part of the rainstorm disaster ontology; (e) heavy rainfall part of the rainstorm disaster ontology; (f) rainstorm part of the rainstorm disaster ontology

Table S1 Seed URLs

| No. | URL                                                                                   | No. | URL                                                                                                                                                                                           |
|-----|---------------------------------------------------------------------------------------|-----|-----------------------------------------------------------------------------------------------------------------------------------------------------------------------------------------------|
| 1   | <a href="http://www.weather.com.cn/rain">http://www.weather.com.cn/rain</a>           | 16  | <a href="http://data.cma.cn">http://data.cma.cn</a>                                                                                                                                           |
| 2   | <a href="http://www.weather.com.cn">http://www.weather.com.cn</a>                     | 17  | <a href="http://www.ninhm.ac.cn">http://www.ninhm.ac.cn</a>                                                                                                                                   |
| 3   | <a href="http://news.weather.com.cn">http://news.weather.com.cn</a>                   | 18  | <a href="http://www.qgshzh.cn">http://www.qgshzh.cn</a>                                                                                                                                       |
| 4   | <a href="http://zhfy.xnl21.com">http://zhfy.xnl21.com</a>                             | 19  | <a href="https://baijiahao.baidu.com/s?id=1599783711923902434&amp;wfr=spider&amp;for=pc">https://baijiahao.baidu.com/s?id=1599783711923902434&amp;wfr=spider&amp;for=pc</a>                   |
| 5   | <a href="http://www.tianqi.com">http://www.tianqi.com</a>                             | 20  | <a href="http://www.whihr.com.cn/news.do?method=showNewsList&amp;netyId=17">http://www.whihr.com.cn/news.do?method=showNewsList&amp;netyId=17</a>                                             |
| 6   | <a href="http://www.zaihai.cn">http://www.zaihai.cn</a>                               | 21  | <a href="https://15tianqi.cn">https://15tianqi.cn</a>                                                                                                                                         |
| 7   | <a href="http://news.cctv.com/special">http://news.cctv.com/special</a>               | 22  | <a href="http://js.weather.com.cn">http://js.weather.com.cn</a>                                                                                                                               |
| 8   | <a href="http://news.cctv.com/special/2016xq">http://news.cctv.com/special/2016xq</a> | 23  | <a href="https://www.mem.gov.cn/kp/zrzh/hlzh">https://www.mem.gov.cn/kp/zrzh/hlzh</a>                                                                                                         |
| 9   | <a href="http://www.jsmb.gov.cn">http://www.jsmb.gov.cn</a>                           | 24  | <a href="http://www.nmc.cn">http://www.nmc.cn</a>                                                                                                                                             |
| 10  | <a href="http://www.qxkp.net/zhfy/byhl">http://www.qxkp.net/zhfy/byhl</a>             | 25  | <a href="http://www.jieri6.com/baike/25506.html">http://www.jieri6.com/baike/25506.html</a>                                                                                                   |
| 11  | <a href="http://www.ndrcc.org.cn">http://www.ndrcc.org.cn</a>                         | 26  | <a href="http://m.421688.com/news">http://m.421688.com/news</a>                                                                                                                               |
| 12  | <a href="http://www.cma.gov.cn">http://www.cma.gov.cn</a>                             | 27  | <a href="http://www.cma.gov.cn/2011xzt/kpbd/rainstorm/2018050901/201805/t20180509_468007.html">http://www.cma.gov.cn/2011xzt/kpbd/rainstorm/2018050901/201805/t20180509_468007.html</a>       |
| 13  | <a href="http://www.qixiangwang.cn/news">http://www.qixiangwang.cn/news</a>           | 28  | <a href="http://www.lzjjdc.com/k/honglaozaihaidefangzhicuoshi">http://www.lzjjdc.com/k/honglaozaihaidefangzhicuoshi</a>                                                                       |
| 14  | <a href="http://www.whihr.com.cn">http://www.whihr.com.cn</a>                         | 29  | <a href="http://www.cma.gov.cn/2011xzt/20120816/20130625/2013062504/201307/t20130701_218122.html">http://www.cma.gov.cn/2011xzt/20120816/20130625/2013062504/201307/t20130701_218122.html</a> |
| 15  | <a href="http://klme.nuist.edu.cn">http://klme.nuist.edu.cn</a>                       | 30  | <a href="http://www.csdata.org/p/618">http://www.csdata.org/p/618</a>                                                                                                                         |
